# Supplementary material for: Analysis of Tyrosine Kinase Inhibitor-Mediated Decline in Contractile Force in Rat Engineered Heart Tissue
Source: PLOS journal article supplement (doi:10.1371/journal.pone.0145937), 2016-02-03
Supplement: S13 (10.1371/journal.pone.0145937.s013) [file redirect.do]

|          | <b>Light Microscopy</b>                                                                                                  | <b>Mitochondria</b>                                     | <b>Z-line</b>                         | <b>Disarray</b>       | <b>Junctions</b>                                           | <b>Autophagy</b>                            | <b>Myelin bodies</b> | <b>Contracted/relaxed</b> |
|----------|--------------------------------------------------------------------------------------------------------------------------|---------------------------------------------------------|---------------------------------------|-----------------------|------------------------------------------------------------|---------------------------------------------|----------------------|---------------------------|
| 24 hours | Plenty of regular sarcomere regions with centralised nucleus                                                             | Round, regular shapes – damaged cristae, some very long | Aligned mostly                        | Some disarray         | Desmosomes visible – very ‘fat’ + irregular central region | Yes – large residual bodies visible         | None                 | Relaxed                   |
| 48 hours | Introduction of irregularity and disruption becomes more pronounced                                                      | Some intact mitochondria, extremely large               | Some ragged regions                   | Some disarray         | Very small desmosomes – thin border, intact gap junction   | Yes – large + small residual bodies visible | Irregular body       | Relaxed                   |
| 72 hours | Regular striations visible, some regions of disarray                                                                     | Large, some intact – some with damaged cristae          | Areas of ragged z-lines, some aligned | Some disarray evident | Long thin gap junctions, small desmosomes visible          | Some autophagy                              | None                 | Relaxed                   |
| 96 hours | Complete disruption (possibly the worst of the three drugs), no structure at all, hard to distinguish structural regions | None intact                                             | Indistinguishable                     | Large disarray        | Irregular desmosomes, some gap junctions                   | Numerous residual bodies visible            | None                 | Contracted                |

S6 Table. Morphological alterations of EHT under sunitinib (10  $\mu$ M; 24-96 hours), 1<sup>st</sup> column (red heading): light microscopy observations; 2-9<sup>th</sup> columns (blue headings): Electron microscopy observations.
